# Supplementary material for: A Prussian blue analog-based copper–aluminum layered double hydroxide for cesium removal from water: fabrication, density functional theory-based molecular modeling, and the adsorption mechanism
Source: Royal Society of Chemistry journal article supplement (doi:10.1039/d3cp03879c), 2023-12-15
Supplement: d3cp03879c1.pdf [file d3cp03879c1.pdf]

## Supplementary Information

Figure S1 The effect of adsorbent dosage on the adsorption performance.

Figure S2 The effect of initial concentration of the pollutant on the adsorption performance.

Figure S3 Initial guess models and optimized models for CAL-221 (1)(4), CAL-441 (2)(5), and CAL-442 (3)(6).

Figure S4 Normal % probability versus internally studentized residuals and experimental data versus predicted data.

Figure S5 Removal rates of Cs from multicomponent simulating seawater and tap water.

Figure S6 Computational models for the substitution of K atoms with Cs atoms in twelve possible Cs insertion sites.

Figure S7 EDS mapping image before adsorption.

Figure S8 EDS mapping image after adsorption.

Table S1 Response surface factors and levels

Table S2 Parameters of CAL-441.

Table S3 Calculation of binding energy of nitrate and ferricyanide inserted into hydrotalcite.

Table S4 process of combining energy calculations.

Table S5 Parameters of the kinetic model.

Table S6 Parameters of the isothermal adsorption model.

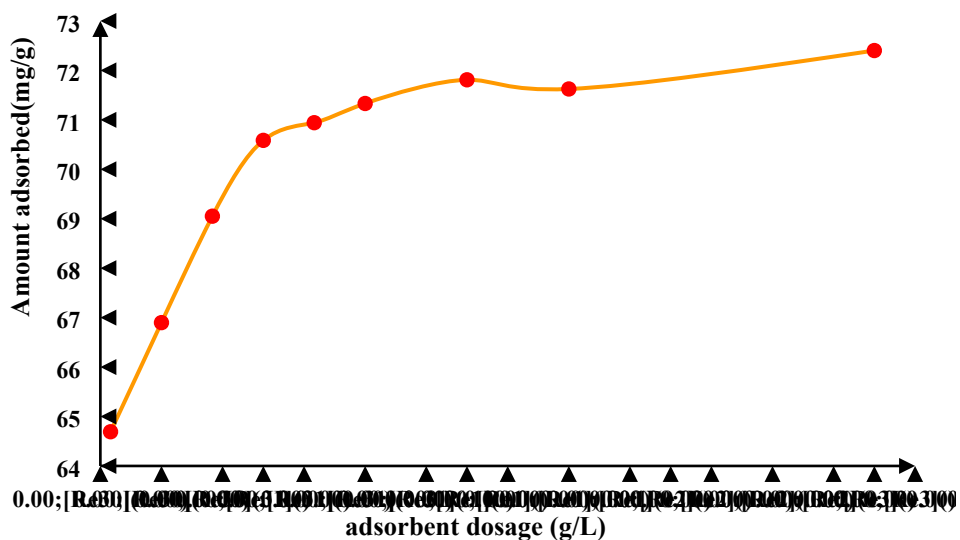

Figure S1 The effect of adsorbent dosage on the adsorption performance.

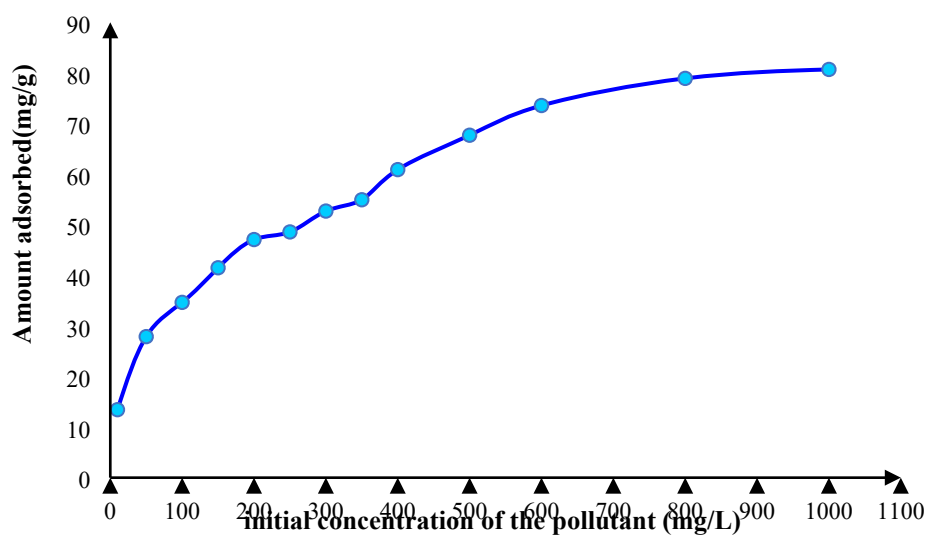

Figure S2 The effect of initial concentration of the pollutant on the adsorption performance.

After optimizing the structures of models with supercell parameters of  $2 \times 2 \times 1$ ,  $4 \times 4 \times 1$ , and  $4 \times 4 \times 2$ , CAL-441 was chosen as the base model for subsequent calculations due to its relatively efficient computational requirements while maintaining accuracy. The parameters of CAL-441 are shown in Supplementary Table S2.

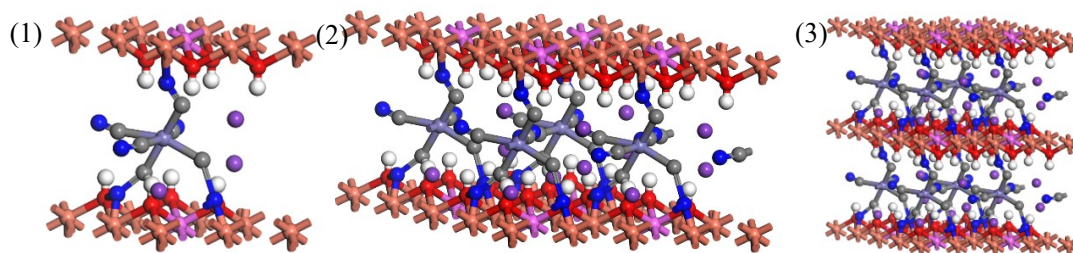

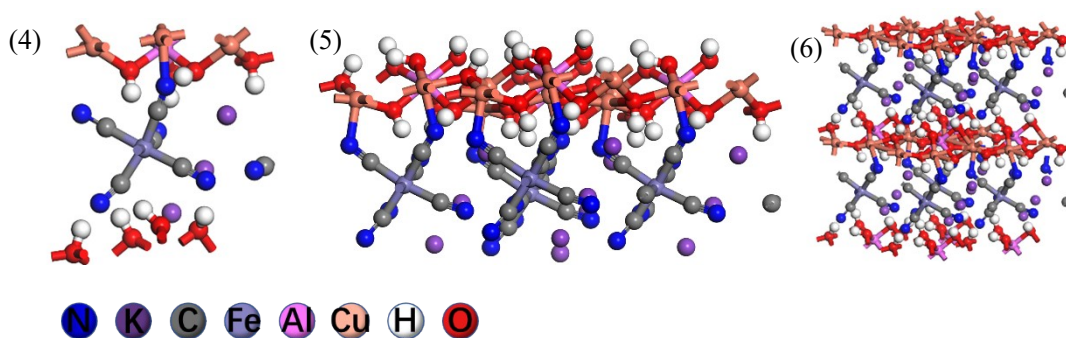

Figure S3 Initial guess models and optimized models for CAL-221 (1)(4), CAL-441 (2)(5), and CAL-442 (3)(6).

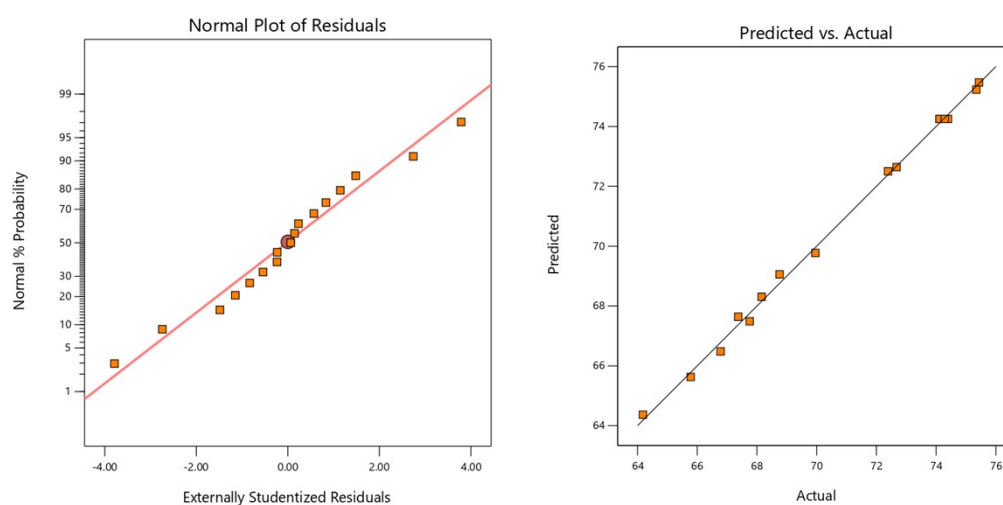

Figure S4 Normal % probability versus internally studentized residuals and experimental data versus predicted data.

Table S1 Response surface factors and levels

| Factor | Name                    | Units | Minimum | Maximum | Mean |
|--------|-------------------------|-------|---------|---------|------|
| A      | pH                      |       | 9       | 11      | 10   |
| B      | temperature             | °C    | 25      | 35      | 30   |
| C      | pollutant concentration | mg/L  | 200     | 500     | 350  |

Table S2 Parameters of CAL-441

| Parameters            | Value                                                                                                   |
|-----------------------|---------------------------------------------------------------------------------------------------------|
| Total Atoms           | 144                                                                                                     |
| Formula Unit          | $\text{Cu}_3\text{H}_8\text{O}_8\text{AlFeC}_6\text{N}_6\text{K}_3$                                     |
| Full Formula Unit     | $\text{Cu}_{12}\text{H}_{32}\text{O}_{32}\text{Al}_4\text{Fe}_4\text{C}_{24}\text{N}_{24}\text{K}_{12}$ |
| Lattice Constants (Å) | 12.662 12.662 8.700                                                                                     |

|                          |          |        |         |
|--------------------------|----------|--------|---------|
| Lattice Angles (°)       | 90.000   | 90.000 | 120.000 |
| Volume (Å <sup>3</sup> ) | 1207.946 |        |         |

To verify the feasibility of interlayer anion exchange, the binding energies of nitrate and ferrocyanide insertion into hydrotalcite were calculated as follows:

$$E_b = E_{tot} - E_M - E_{none}$$

$E_b$  represents the binding energy of the inserted anionic group in hydrotalcite,  $E_{tot}$  denotes the overall energy of the structure after the insertion of the anionic group,  $E_M$  refers to the energy associated with the anionic group, and  $E_{none}$  represents the total energy of the defective structure of hydrotalcite without the anionic group.

在优化好的结构基础上（CAL-441）进行铁氰基的结合能计算，得到的结果如 Table S3 所示。

Table S3 Calculation of binding energy of nitrate and ferricyanide inserted into hydrotalcite

| Functional group                   | $E_{tot}$ (eV) | $E_{none}$ (eV) | $E_M$ (eV) | $E_b$ (eV) |
|------------------------------------|----------------|-----------------|------------|------------|
| NO <sub>3</sub>                    | -141.1854      | -114.524        | -23.0032   | -3.6582    |
| K <sub>3</sub> Fe(CN) <sub>6</sub> | -834.3953      | -392.084        | -432.3346  | -9.9767    |

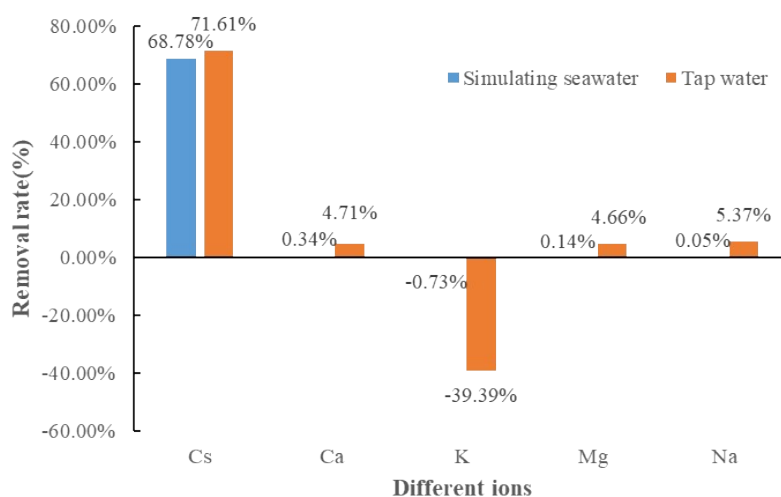

Figure S5 Removal rates of Cs from multicomponent simulating seawater and tap water.

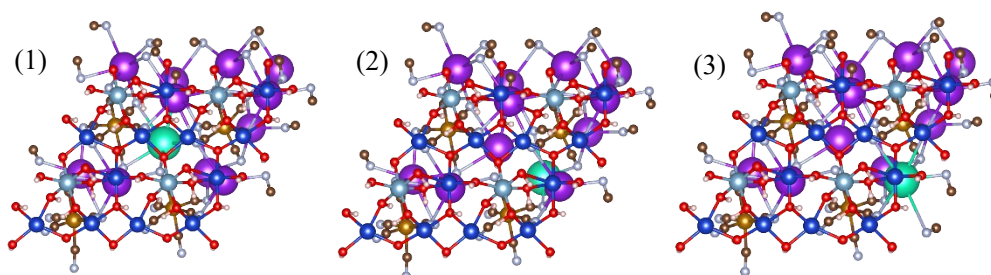

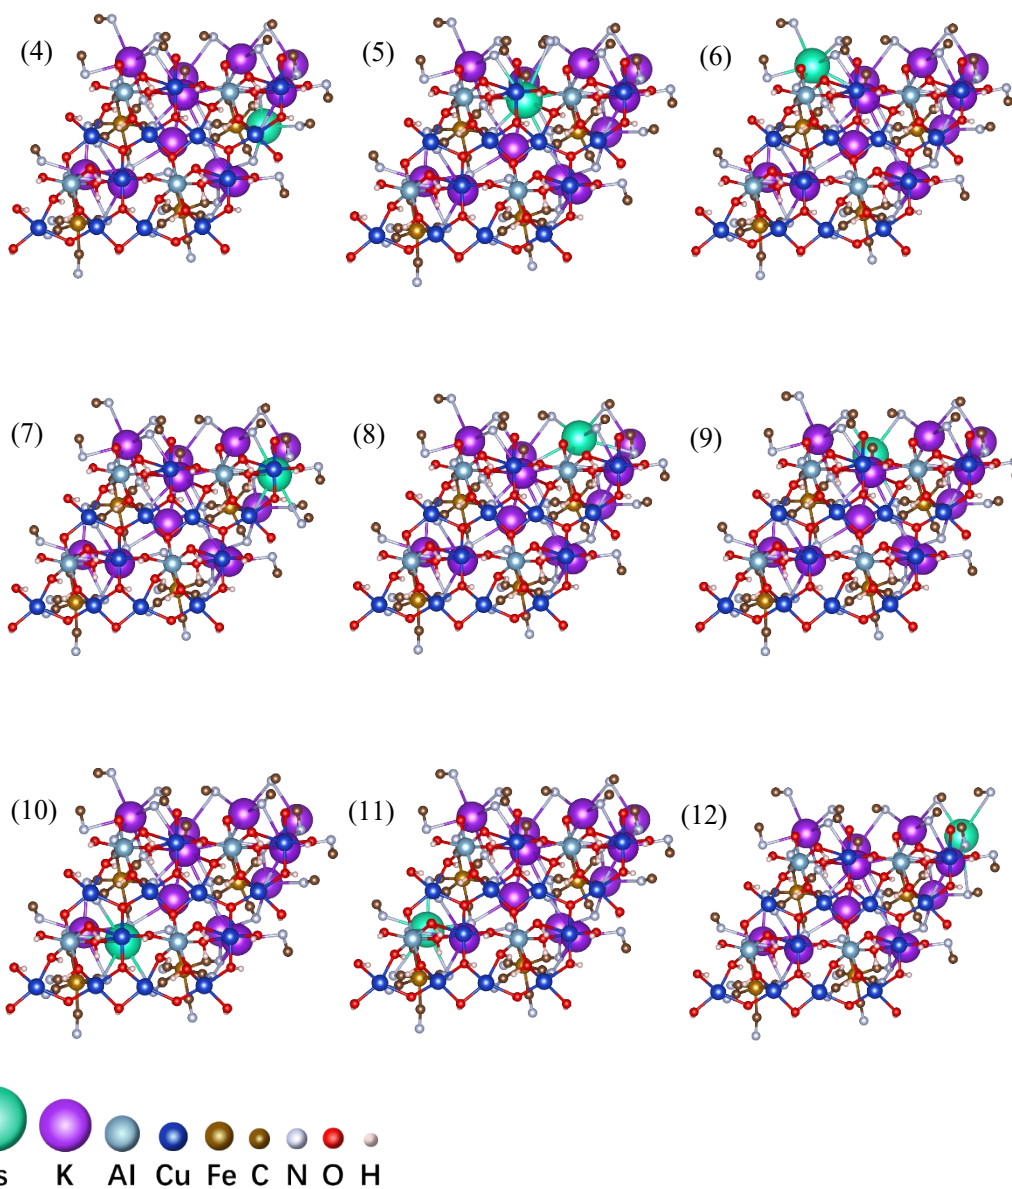

Figure S6 Computational models for the substitution of K atoms with Cs atoms in twelve possible Cs doping sites.

Table S4 process of combining energy calculations

unit: eV

|              | doping sites | $E_{\text{tot}}$ | $E_{\text{none}}$ | Binding energy of $\text{Cs}_i$ | Binding energy of $\text{K}_i$ | Exchange energy | $E_{\text{Cs}}$ | $E_{\text{K}}$ |
|--------------|--------------|------------------|-------------------|---------------------------------|--------------------------------|-----------------|-----------------|----------------|
| CAL-441-slab | -            | -863.75          | -                 | -                               | -                              | -               | -               | -              |
| CAL-441-Cs1  | K1           | -864.74          | -860.49           | -4.21                           | -3.22                          | -0.99           | -0.0436         | -0.0370        |
| CAL-441-Cs2  | K2           | -865.09          | -861.35           | -3.70                           | -2.36                          | -1.33           | -0.0435         | -0.0371        |
| CAL-441-Cs3  | K3           | -864.63          | -860.89           | -3.69                           | -2.82                          | -0.88           | -0.0439         | -0.0371        |
| CAL-441-Cs4  | K4           | -873.05          | -869.35           | -3.66                           | 5.64                           | -9.29           | -0.0436         | -0.0371        |

|              |     |         |         |       |      |        |         |         |
|--------------|-----|---------|---------|-------|------|--------|---------|---------|
| CAL-441-Cs5  | K5  | -873.33 | -870.95 | -2.33 | 7.24 | -9.57  | -0.0441 | -0.0373 |
| CAL-441-Cs6  | K6  | -872.85 | -869.5  | -3.31 | 5.79 | -9.10  | -0.0440 | -0.0373 |
| CAL-441-Cs7  | K7  | -873.50 | -870.1  | -3.36 | 6.39 | -9.75  | -0.0441 | -0.0373 |
| CAL-441-Cs8  | K8  | -873.46 | -870.16 | -3.26 | 6.45 | -9.71  | -0.0439 | -0.0373 |
| CAL-441-Cs9  | K9  | -874.02 | -869.95 | -4.02 | 6.24 | -10.26 | -0.0442 | -0.0373 |
| CAL-441-Cs10 | K10 | -873.49 | -869.97 | -3.47 | 6.26 | -9.73  | -0.0441 | -0.0373 |
| CAL-441-Cs11 | K11 | -874.22 | -870.16 | -4.02 | 6.45 | -10.47 | -0.0443 | -0.0373 |
| CAL-441-Cs12 | K12 | -873.79 | -870.25 | -3.50 | 6.54 | -10.04 | -0.0441 | -0.0373 |

Table S5 Parameters of the kinetic model

| Kinetic models      | parameters                                                    | LDH     | PB-LDH  |
|---------------------|---------------------------------------------------------------|---------|---------|
| pseudo_first_order  | $q_e(\text{mg/g})$                                            | 30.1518 | 111.081 |
|                     | $k_1 (\text{min}^{-1})$                                       | 0.02372 | 0.01670 |
|                     | $R^2$                                                         | 0.98809 | 0.94668 |
| pseudo_second_order | $q_e(\text{mg/g})$                                            | 32.6736 | 123.412 |
|                     | $k_2 (\text{g}/(\text{mg}\cdot\text{min}))$                   | 0.00099 | 0.00017 |
|                     | $R^2$                                                         | 0.98355 | 0.98891 |
| Eovich              | $\alpha \times 10^{-3} (\text{mg}/(\text{g}\cdot\text{min}))$ | 3.60627 | 8.72238 |
|                     | $\beta (\text{g}/\text{mg})$                                  | 0.19289 | 0.05069 |
|                     | $R^2$                                                         | 0.87677 | 0.93524 |

Table S6 Parameters of the isothermal adsorption model

| Isotherm model | parameters                                     | LDH     |         |         | PB@LDH  |         |         |
|----------------|------------------------------------------------|---------|---------|---------|---------|---------|---------|
|                |                                                | 288K    | 298K    | 308K    | 288K    | 298K    | 308K    |
| Langmuir       | $q_{\text{max}}(\text{mg/g})$                  | 30.3272 | 34.8353 | 37.5606 | 72.9721 | 89.4354 | 109.221 |
|                | $K_L(\text{L}/\text{mg})$                      | 0.00448 | 0.00509 | 0.00846 | 0.00975 | 0.00772 | 0.00582 |
|                | $R^2$                                          | 0.98914 | 0.93761 | 0.99247 | 0.82250 | 0.88508 | 0.89662 |
| Freundlich     | $K_F(\text{L}^n/\text{g}\cdot\text{mg}^{n-1})$ | 1.37995 | 3.16918 | 3.98149 | 10.1035 | 10.3304 | 9.10797 |
|                | $1/n$                                          | 0.43376 | 0.33129 | 0.32472 | 0.28286 | 0.30361 | 0.34446 |
|                | $R^2$                                          | 0.94469 | 0.80131 | 0.92526 | 0.98307 | 0.98064 | 0.99572 |
| Tempkin        | A                                              | 6.70030 | 8.04500 | 7.97518 | 12.4534 | 15.3512 | 18.9051 |
|                | $K_T(\text{mM}^{-1})$                          | 0.04388 | 0.04829 | 0.08928 | 0.22867 | 0.17609 | 0.12572 |
|                | $R^2$                                          | 0.98604 | 0.91129 | 0.98511 | 0.93066 | 0.93607 | 0.92826 |



|                            |                                    |         |         |         |         |         |         |
|----------------------------|------------------------------------|---------|---------|---------|---------|---------|---------|
| Dubin-<br>Radushk<br>evich | qs(mg/g)                           | 20.9672 | 27.6100 | 29.2187 | 58.6068 | 69.2992 | 79.0707 |
|                            | $K_{DR}(\text{mol}^2/\text{kJ}^2)$ | 0.00159 | 0.00175 | 0.00069 | 0.00057 | 0.00076 | 0.00087 |
|                            | $R^2$                              | 0.83881 | 0.96832 | 0.82332 | 0.35994 | 0.49343 | 0.52492 |

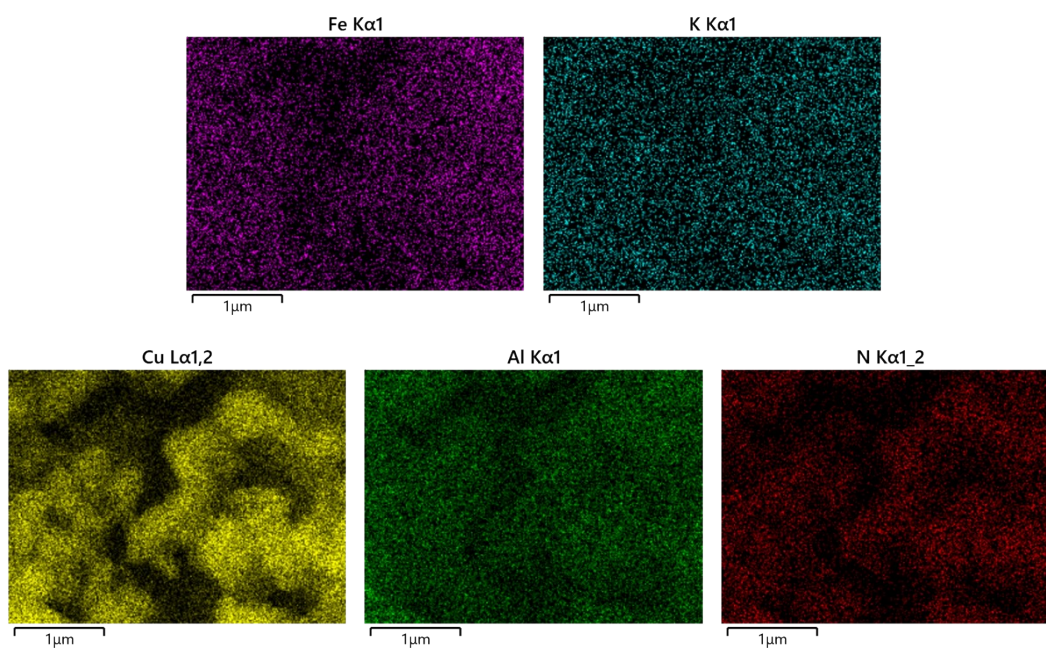

Figure S7 EDS mapping image before adsorption

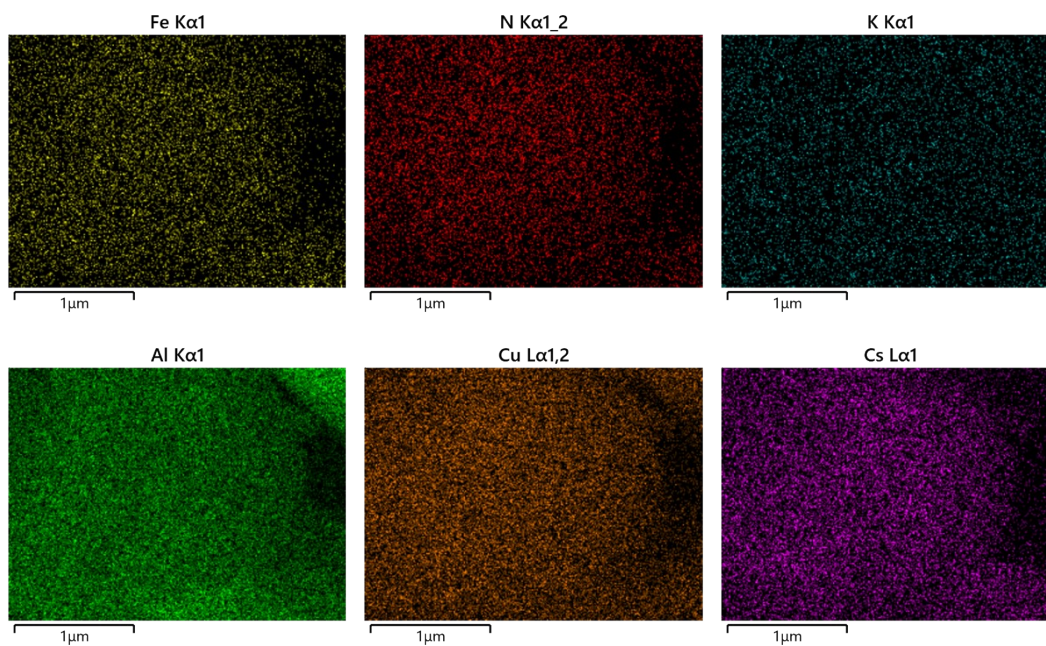

Figure S8 EDS mapping image after adsorption
